# Supplementary material
Source: bioRxiv or medRxiv preprint supplement (https://medrxiv.org/highwire/filestream/84802/field_highwire_adjunct_files/0/2020.06.04.20122812-1.pdf)

### Supplementary material 1. MEDLINE search strategy

|    | Search terms                                                                                                                                     |
|----|--------------------------------------------------------------------------------------------------------------------------------------------------|
| 1  | [narrow exposure]                                                                                                                                |
| 2  | (covid* or ncov* or 2019-novel CoV or SARS-CoV2 or SARS-CoV-2 or SARSCoV2 or SARSCov-2 or "severe acute respiratory syndrome coronavirus 2").mp. |
| 3  | (coronavirus* or corona virus*).mp. and 2020*.dp.                                                                                                |
| 4  | ((novel or new or "2019" or "19" or "2" or pandemic or crisis or outbreak or Wuhan or China) adj3 (coronavirus* or corona virus*)).mp.           |
| 5  | Covid-19.rx.                                                                                                                                     |
| 6  | coronavirus infections/ and 2020*.dp.                                                                                                            |
| 7  | Pneumonia, Viral/ and 2020*.dp.                                                                                                                  |
| 8  | 2 or 3 or 4 or 5 or 6 or 7                                                                                                                       |
| 9  | [broader exposure]                                                                                                                               |
| 10 | (MERS or Middle East Respiratory Syndrome or Middle Eastern Respiratory Syndrome).mp.                                                            |
| 11 | (SARS or Severe Acute Respiratory Syndrome).mp.                                                                                                  |
| 12 | (h5n1 or bird flu or avian influenza).mp.                                                                                                        |
| 13 | (h1n1 or swine flu).mp.                                                                                                                          |
| 14 | ((influenza or flu or grippe) adj2 (pandemic* or epidemic*)).mp.                                                                                 |
| 15 | (Pneumonia, Viral/ or influenza, human/) and exp disease outbreaks/                                                                              |
| 16 | coronavirus infections/ or Severe Acute Respiratory Syndrome/                                                                                    |
| 17 | 10 or 11 or 12 or 13 or 14 or 15 or 16                                                                                                           |
| 18 | [both exposures]                                                                                                                                 |
| 19 | 8 or 17                                                                                                                                          |
| 20 | [outcome: mental health]                                                                                                                         |
| 21 | Mental.mp.                                                                                                                                       |
| 22 | exp mental disorders/                                                                                                                            |
| 23 | mental health/                                                                                                                                   |
| 24 | Depression/                                                                                                                                      |
| 25 | (depression or depressive or depressed).mp.                                                                                                      |
| 26 | (psychotic or psychosis or psychoses).mp.                                                                                                        |
| 27 | (mental* adj1 ill*).mp.                                                                                                                          |
| 28 | ((neurotic or somatoform or eating or cognitive or adjustment) adj1 disorder*).mp.                                                               |
| 29 | affective.mp                                                                                                                                     |
| 30 | mood.mp                                                                                                                                          |
| 31 | personality.mp                                                                                                                                   |
| 32 | cognit*.mp                                                                                                                                       |
| 33 | sleep.mp                                                                                                                                         |
| 34 | psychiatric.mp                                                                                                                                   |
| 35 | irritability.mp                                                                                                                                  |

|    |                                                                                                                                      |
|----|--------------------------------------------------------------------------------------------------------------------------------------|
| 36 | hallucinat*.mp                                                                                                                       |
| 37 | delusion*.mp                                                                                                                         |
| 38 | agitat*.mp                                                                                                                           |
| 39 | euphori*.mp                                                                                                                          |
| 40 | disinhibit*.mp                                                                                                                       |
| 41 | aggressi*.mp                                                                                                                         |
| 42 | post-trauma*.mp                                                                                                                      |
| 43 | posttrauma*.mp                                                                                                                       |
| 44 | appetite.mp                                                                                                                          |
| 45 | confus*.mp                                                                                                                           |
| 46 | exp sleep/                                                                                                                           |
| 47 | exp wakefulness/                                                                                                                     |
| 48 | exp disorders of excessive somnolence/                                                                                               |
| 49 | exp parasomnias/                                                                                                                     |
| 50 | exp hallucinations/                                                                                                                  |
| 51 | exp delusions/                                                                                                                       |
| 52 | exp psychomotor agitation/                                                                                                           |
| 53 | exp aggression/                                                                                                                      |
| 54 | exp appetite/                                                                                                                        |
| 55 | exp confusion/                                                                                                                       |
| 56 | (neuroses or neurosis).mp.                                                                                                           |
| 57 | anxiet*.mp.                                                                                                                          |
| 58 | agoraphobi*.mp.                                                                                                                      |
| 59 | obsessive-compulsive*.mp.                                                                                                            |
| 60 | (hoarding or hoarder*).mp.                                                                                                           |
| 61 | panic disorder*.mp.                                                                                                                  |
| 62 | (phobic or phobia*).mp.                                                                                                              |
| 63 | schizophreni*.mp.                                                                                                                    |
| 64 | (bipolar disorder* or bipolar depression).mp.                                                                                        |
| 65 | (mania or manias or manic).mp.                                                                                                       |
| 66 | (anorexi* or bulemi*).mp.                                                                                                            |
| 67 | (stress or stressed or stressful).mp.                                                                                                |
| 68 | (psychiatr* or psycholog* or neuropsych*).mp.                                                                                        |
| 69 | ((cognitive* or neurocognitive*) adj1 (impair* or deteriorat* or declin* or disorder* or dysfunction* or disease* or function*)).mp. |
| 70 | (dementia* or demented).mp.                                                                                                          |
| 71 | alzheimer*.mp.                                                                                                                       |
| 72 | (deliri* or delirious).mp.                                                                                                           |
| 73 | distress*.mp.                                                                                                                        |
| 74 | psychological distress/                                                                                                              |
| 75 | sadness/                                                                                                                             |
| 76 | exp fear/                                                                                                                            |
| 77 | sadness.mp.                                                                                                                          |

|     |                                                                                                   |
|-----|---------------------------------------------------------------------------------------------------|
| 78  | (fear or fearful).mp.                                                                             |
| 79  | exp self-injurious behavior/                                                                      |
| 80  | suicid*.mp.                                                                                       |
| 81  | (self-injur* or self-harm*).mp.                                                                   |
| 82  | (PTSD or post-traumatic stress disorder*).mp.                                                     |
| 83  | exp substance-related disorders/                                                                  |
| 84  | (addict* or "substance use" or "drug use" or substance-related disorder* or substance abuse*).mp. |
| 85  | (alcoholic* or alcoholism or (alcohol adj2 (abuse or disorder*))).mp.                             |
| 86  | exp mental health services/                                                                       |
| 87  | (counseling or counselling).mp.                                                                   |
| 88  | anhedonia/                                                                                        |
| 89  | anhedoni*.mp.                                                                                     |
| 90  | insomni*.mp.                                                                                      |
| 91  | ((qi gong or qigong) adj1 (induced disorder* or psychosis or mental disorder*)).mp.               |
| 92  | Shenjing shuairu.mp.                                                                              |
| 93  | neurasthenia.mp.                                                                                  |
| 94  | psychology.fs.                                                                                    |
| 95  | [well-being outcome concept]                                                                      |
| 96  | exp social isolation/                                                                             |
| 97  | (lonely or loneliness or lonelier).mp.                                                            |
| 98  | (psychological* or psychosocial* or psycho-social*).mp.                                           |
| 99  | psychosocial deprivation/                                                                         |
| 100 | quality of life/                                                                                  |
| 101 | (quality of life or QOL or HRQOL or HQOL).mp.                                                     |
| 102 | social distance*.mp.                                                                              |
| 103 | social distance/                                                                                  |
| 104 | (social* adj1 (distance or distant or accept* or reject*)).mp.                                    |
| 105 | social* isolat*.mp.                                                                               |
| 106 | ((social or psychosocial) adj1 support).mp.                                                       |
| 107 | exp social support/                                                                               |
| 108 | exp adaptation, psychological/                                                                    |
| 109 | (coping adj1 (behavior* or behaviour* or skill*)).mp.                                             |
| 110 | ((adaptive or maladaptive) adj1 (behavior*)).mp.                                                  |
| 111 | (wellbeing or well-being).mp.                                                                     |
| 112 | social stigma/                                                                                    |
| 113 | stigma.mp.                                                                                        |
| 114 | wellness.mp.                                                                                      |
| 115 | social discrimination/ or ageism/ or racism/                                                      |
| 116 | (discriminat* or ageism or ageist or racism or racist*).mp.                                       |
| 117 | resilience, psychological/                                                                        |
| 118 | resilien*.mp.                                                                                     |
| 119 | life satisfaction.mp.                                                                             |

|     |                                                                                                                                                                                                                                           |
|-----|-------------------------------------------------------------------------------------------------------------------------------------------------------------------------------------------------------------------------------------------|
| 120 | self-satisfaction.mp.                                                                                                                                                                                                                     |
| 121 | value of life/                                                                                                                                                                                                                            |
| 122 | (value of life or valuation* of life).mp.                                                                                                                                                                                                 |
| 123 | self-efficacy.mp.                                                                                                                                                                                                                         |
| 124 | exp self concept/                                                                                                                                                                                                                         |
| 125 | self-esteem.mp.                                                                                                                                                                                                                           |
| 126 | ((positive or negative) adj1 affect).mp.                                                                                                                                                                                                  |
| 127 | empowerment/                                                                                                                                                                                                                              |
| 128 | Empower*.mp.                                                                                                                                                                                                                              |
| 129 | (hopeless* or hopeful* or hope).mp.                                                                                                                                                                                                       |
| 130 | dysthmi*.mp.                                                                                                                                                                                                                              |
| 131 | exp personality/ or personalit*.mp.                                                                                                                                                                                                       |
| 132 | exp stress, psychological/                                                                                                                                                                                                                |
| 133 | burnout.mp.                                                                                                                                                                                                                               |
| 134 | burden*.mp.                                                                                                                                                                                                                               |
| 135 | exp emotions/                                                                                                                                                                                                                             |
| 136 | (anger or anxiety or apathy or bereavement or courage or grief or guilt or shame or anxious or bereaving or courageous or grieving).mp.                                                                                                   |
| 137 | humiliat*.mp.                                                                                                                                                                                                                             |
| 138 | social networking/ or online social networking/                                                                                                                                                                                           |
| 139 | Social* network*.mp.                                                                                                                                                                                                                      |
| 140 | exp social behavior disorders/                                                                                                                                                                                                            |
| 141 | Social dysfunction.mp.                                                                                                                                                                                                                    |
| 142 | low spirits.mp.                                                                                                                                                                                                                           |
| 143 | exp superstitions/                                                                                                                                                                                                                        |
| 144 | (witchcraft or magic or curse*).mp.                                                                                                                                                                                                       |
| 145 | ((qi gong or qigong) adj1 deviation*).mp.                                                                                                                                                                                                 |
| 146 | Zou huo ru mo.mp.                                                                                                                                                                                                                         |
| 147 | ((psychosocial or psycho-social or psychological or social or emotion* or cogniti* or marital or relational or sexual or financial or spiritual or famil*) adj5 (wellbeing or well-being or difficult* or function* or dysfunction*)).mp. |
| 148 | exp Psychiatric status rating scales/                                                                                                                                                                                                     |
| 149 | emotion*.mp.                                                                                                                                                                                                                              |
| 150 | employment.mp                                                                                                                                                                                                                             |
| 151 | (unemployment).ti,ab                                                                                                                                                                                                                      |
| 152 | exp employment/                                                                                                                                                                                                                           |
| 153 | exp unemployment/                                                                                                                                                                                                                         |
| 154 | [outcomes summation]                                                                                                                                                                                                                      |
| 155 | or/21-153                                                                                                                                                                                                                                 |
| 156 | [older adult population]                                                                                                                                                                                                                  |
| 157 | ((Older or old) adj1 (person* or adult* or men or women or patient* or individual* or people or population)).mp.                                                                                                                          |
| 158 | (elderly or elder or elders).mp.                                                                                                                                                                                                          |

|     |                                                                                                    |
|-----|----------------------------------------------------------------------------------------------------|
| 159 | geriatric*.mp.                                                                                     |
| 160 | (seniors or senior citizen).mp.                                                                    |
| 161 | ((("65" or sixty five) adj1 (years or year or age)).mp.                                            |
| 162 | ((("60" or sixty) adj1 (years or year or age)).mp.                                                 |
| 163 | Aged.mp.                                                                                           |
| 164 | health services for the aged/                                                                      |
| 165 | geriatric assessment/                                                                              |
| 166 | or/157-165                                                                                         |
| 167 | (adult/ or adolescent/ or exp child/ or exp infant/ or middle aged/ or young adult/) not exp aged/ |
| 168 | 166 not 167                                                                                        |
| 169 | [summation]                                                                                        |
| 170 | 19 and 155 and 168                                                                                 |

## Supplementary material 2. Search sources scheme

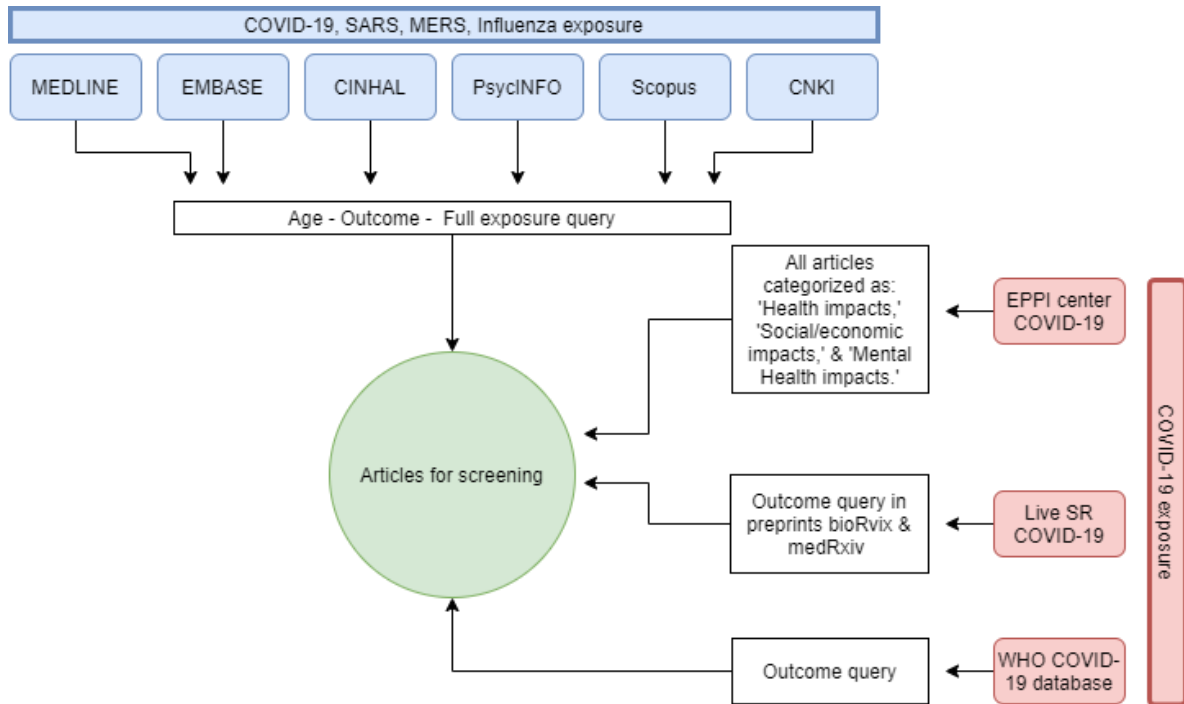

Supplement: Supplementary file [file 2020.06.04.20122812-1.pdf]
